# Supplementary material
Source: Springer Nature journal article supplement (https://www.springermedizin.de/resource/supplementary/12981_2006_68_MOESM2_ESM.pdf/9603756)

**A**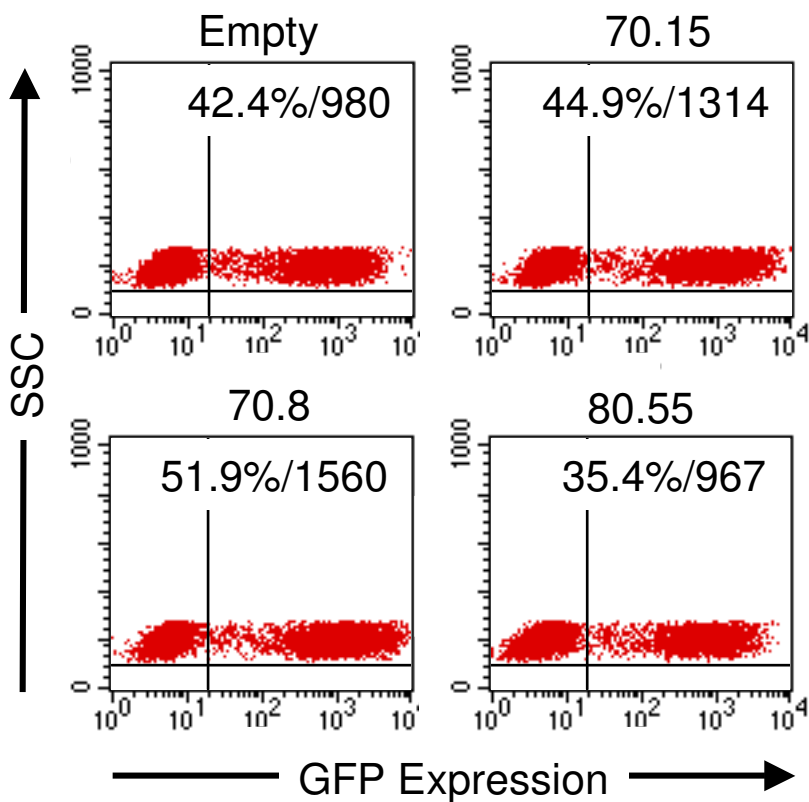**B**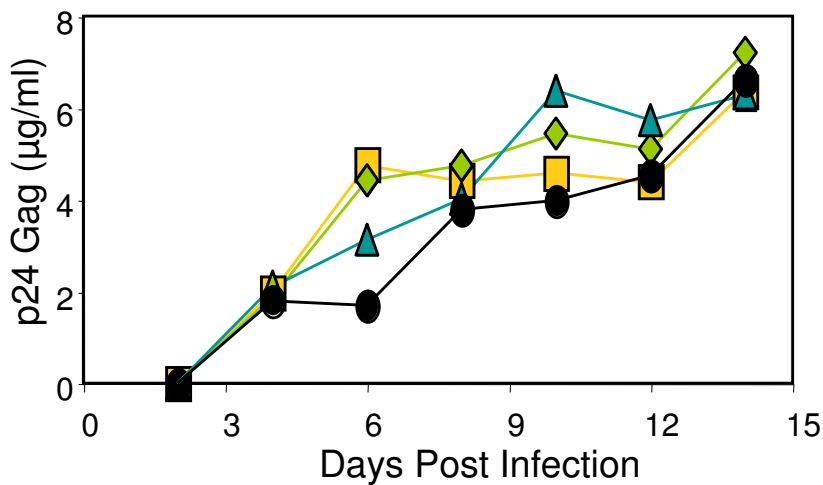

Supplement: MOESM2 [file 9603756]
